# Supplementary material for: Carbazole-functionalized cobalt(ii) porphyrin axially bonded with C60/C70 derivatives: synthesis and characterization
Source: Royal Society of Chemistry journal article supplement (doi:10.1039/d1nj00980j), 2021-01-01

Supporting information

## CARBAZOLE-FUNCTIONALIZED COBALT(II) PORPHYRIN AXIALLY BONDED WITH C<sub>60</sub>/C<sub>70</sub> DERIVATIVES: SYNTHESIS, AND CHARACTERIZATION

E.N. Ovchenkova<sup>1\*</sup>, N.G. Bichan<sup>1</sup>, M.S. Gruzdev<sup>1</sup>, A.A. Ksenofontov<sup>1</sup>, F.E. Gostev<sup>2</sup>, I.V. Shelaev<sup>2</sup>, V.A. Nadtochenko<sup>2</sup>, T.N. Lomova<sup>1</sup>

<sup>1</sup>G.A. Krestov Institute of Solution Chemistry, Russian Academy of Sciences

Akademicheskaya str., 1; Ivanovo, Russia

<sup>2</sup>N.N. Semenov Federal Research Center for Chemical Physics, Russian Academy of Sciences, Kosygina st.,  
4, Moscow, Russia

|                                                                                                                                                                                                                      |   |
|----------------------------------------------------------------------------------------------------------------------------------------------------------------------------------------------------------------------|---|
| Synthesis of 1-N-methyl-2-(pyridin-4-yl)-3,4-fullero[60]pyrrolidine, PyC <sub>60</sub> .....                                                                                                                         | 2 |
| Figure S1. PyC <sub>60</sub> MALDI TOF mass spectrum.....                                                                                                                                                            | 2 |
| Synthesis of 2,5-di-(pyridin-2-yl)-3,4-fullero[70]pyrrolidine, Py <sub>2</sub> C <sub>70</sub> .....                                                                                                                 | 3 |
| Figure S2. Py <sub>2</sub> C <sub>70</sub> MALDI TOF mass spectrum.....                                                                                                                                              | 3 |
| Table S1. UV-vis spectra of several <i>meso</i> -substituted porphyrins and cobalt porphyrins.....                                                                                                                   | 4 |
| Table S2. The chemical shifts of H <sub>β</sub> and H <sub>δ</sub> in cobalt(II) porphyrins and their supramolecular systems with pyrrolidino[60]/[70]fullerenes.....                                                | 4 |
| Figure S3. The transformation of the UV-vis spectrum of the CoDTBCP – 5.49 × 10 <sup>-5</sup> M PyC <sub>60</sub> mixture in toluene at 298 K during 1000 seconds.....                                               | 5 |
| Figure S4. The plots of log((A <sub>0</sub> – A <sub>∞</sub> )/(A <sub>τ</sub> – A <sub>∞</sub> )) vs τ for the reaction of CoDTBCP with PyC <sub>60</sub> in toluene at 298 K.....                                  | 5 |
| Figure S5. The plot of logk <sub>obs</sub> vs logC <sub>PyC<sub>60</sub></sub> for the reaction of CoDTBCP with PyC <sub>60</sub> in toluene at 298 K.....                                                           | 5 |
| Figure S6. The plots of log((A <sub>0</sub> – A <sub>∞</sub> )/(A <sub>τ</sub> – A <sub>∞</sub> )) vs τ for the reaction of CoDTBCP with Py <sub>2</sub> C <sub>70</sub> in toluene at 298 K.....                    | 6 |
| Figure S7. The plot of logk <sub>obs</sub> vs logC <sub>Py<sub>2</sub>C<sub>70</sub></sub> for the reaction of CoDTBCP with Py <sub>2</sub> C <sub>70</sub> in toluene at 298 K.....                                 | 6 |
| Figure S8. The IR spectra of CoDTBCP (black) and its triad with Py <sub>2</sub> C <sub>70</sub> (green) in KBr. Bands corresponding to vibrations of Py <sub>2</sub> C <sub>70</sub> are denoted with asterisks..... | 6 |
| Figure S9. The <sup>1</sup> H NMR spectrum of CoDTBCP (a), its triad, (PyC <sub>60</sub> ) <sub>2</sub> CoDTBCP (b), and its dyad, (Py <sub>2</sub> C <sub>70</sub> )CoDTBCP (c) in CDCl <sub>3</sub> .....          | 7 |
| Figure S10. The optimized structures of (PyC <sub>60</sub> ) <sub>2</sub> CoDTBCP (a) and (Py <sub>2</sub> C <sub>70</sub> )CoDTBCP (b).....                                                                         | 8 |
| Table S3. The structural parameters (bond lengths, angles, and bonding energy (E <sub>b</sub> )) of (PyC <sub>60</sub> ) <sub>2</sub> CoDTBCP and (Py <sub>2</sub> C <sub>70</sub> )CoDTBCP.....                     | 8 |
| Figure S11. Femtosecond transient absorption spectrum of CoDTBCP in toluene at the excitation wavelength of 400 nm (Insert: the time profile of transient peaks of CoDTBCP).....                                     | 9 |

## Synthesis of 1-N-methyl-2-(pyridin-4-yl)-3,4-fullero[60]pyrrolidine, PyC<sub>60</sub>.

PyC<sub>60</sub> was prepared according to a general procedure of fulleropyrrolidine synthesis developed by Prato and coworkers [Prato M., Maggini M., Giacometti C., et al. // Tetrahedron. 1996. V.52. №. 14. P. 5221. [https://doi.org/10.1016/0040-4020\(96\)00126-3](https://doi.org/10.1016/0040-4020(96)00126-3)]. The changes in the procedure (the ratio of reagents, the reaction time, and the purification method) were done, which led to the increase in the yield of the product (Supplementary Information). UV-vis (toluene):  $\lambda_{\max}$  (log $\epsilon$ ) = 312, 328, 433 (3.56) nm. IR (KBr)  $\nu$  404, 431, 448, 479, 504, 527, 553, 574, 598, 635, 664, 707, 737, 767, 785, 824, 840, 910, 940, 989, 1034, 1067, 1083, 1109, 1123, 1179, 1215, 1246, 1268, 1314, 1334, 1409, 1430, 1463, 1561, 1595, 1736, 2783, 2845, 2920, 2948 cm<sup>-1</sup>. <sup>1</sup>H NMR (CDCl<sub>3</sub>):  $\delta$  8.71 (d, *J* 5.49 Hz, 2H, CH<sub>Py</sub>), 7.82 (m, 2H, CH<sub>Py</sub>), 5.02 (d, *J* 9.77 Hz, 1H, CH<sub>2</sub>), 4.96 (s, 1H, CH<sub>2</sub>), 4.31 (d, *J* 9.77 Hz, 1H, CH-N), 2.83 (s, 3H, CH<sub>Py</sub>). MS (MALDI-TOF), *m/z* (rel. int.): 852.87 (100) [M]<sup>+</sup>, 853.88 (77) [M-H]<sup>+</sup>, 719.83 (53) [C<sub>60</sub>]<sup>+</sup> (Fig. S1).

**Figure S1. PyC<sub>60</sub> MALDI TOF mass spectrum.**

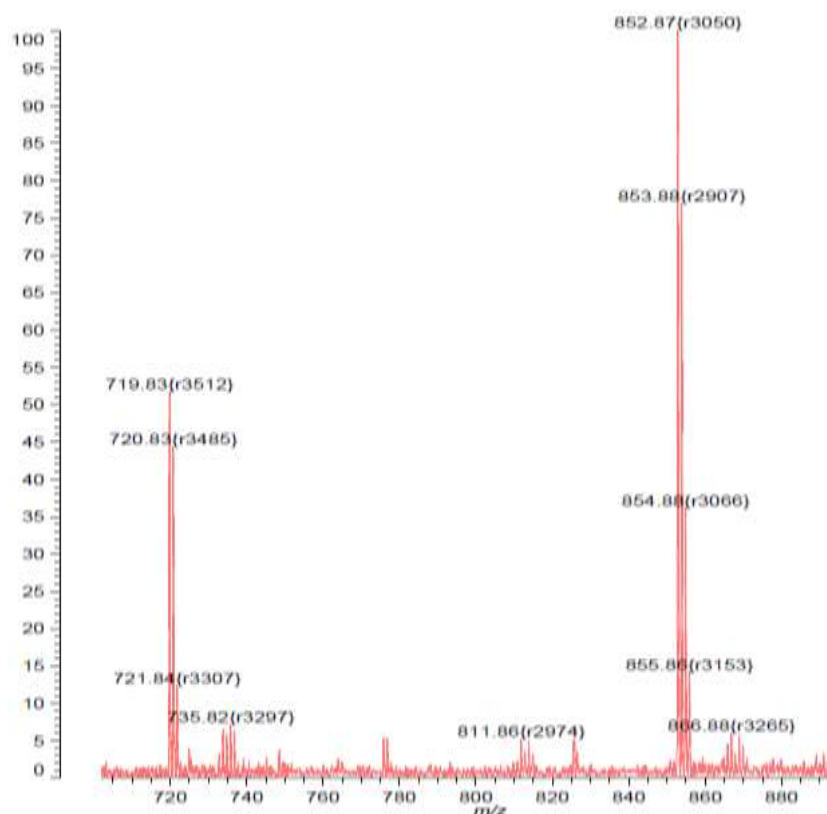

Although PyC<sub>60</sub> is expected to give one signal in MALDI TOF mass-spectrum with *m/z* corresponding to the formula C<sub>68</sub>H<sub>10</sub>N<sub>2</sub> (calc. *m/z* 854.0) it gives the signal with *m/z* 719.83, corresponding to the [C<sub>60</sub>]<sup>+</sup>. It is expected that this signal are formed under the conditions of mass spectrum registration.

### Synthesis of 2,5-di-(pyridin-2-yl)-3,4-fullero[70]pyrrolidine, Py<sub>2</sub>C<sub>70</sub>

Pyridine-2-carboxyaldehyde (15 mg, 0.14 mmol) and 2-picolylamine (15 mg, 0.14 mmol) dissolved in dichlorobenzene (3 ml) were added to the dichlorobenzene solution of C<sub>70</sub> (100 mg, 0.12 mmol). The reaction mixture was heated at 180<sup>o</sup>C for 15 min. Then the solvent was removed by vacuum distillation. The residue was dissolved with toluene and adsorbed on silica gel: the first zone is unreacted C<sub>70</sub> (toluene as an eluent), and the second zone is Py<sub>2</sub>C<sub>70</sub> (toluene:methanol (20:1) as an eluent). The yield: 45 mg (45 %). UV-vis, toluene ( $\lambda_{\text{max}}$ , nm (log $\epsilon$ )): 398 (4.91), 464 (4.23). IR (KBr)  $\nu$ , cm<sup>-1</sup>: 402, 437, 464, 534, 555, 569, 580, 622, 636, 641, 672, 690, 726, 746, 755, 770, 777, 794, 823, 833, 865, 910, 925, 996, 1047, 1089, 1127, 1147, 1219, 1256, 1293, 1321, 1376, 1412, 1427, 1441, 1472, 1493, 1513, 1571, 1590, 1753, 2850, 2920, 3008, 3050. <sup>1</sup>H NMR (CDCl<sub>3</sub>):  $\delta$ , ppm: 9.17 (d, J 5.40 Hz, 1H), 8.94 (d, J 5.20 Hz 1H), 8.77 (m, 1H), 8.36 (m, 1H), 8.16 (m, 1H), 7.95 (t, J 7.73 Hz, 1H), 7.71 (m, 1H), 7.55 (m, 1H), 6.37 (s, 1H), 6.20 (s, 1H), 5.17 (s, 1H). MALDI-TOF MS, m/z: 1040.29 [M]<sup>+</sup>.

**Figure S2. Py<sub>2</sub>C<sub>70</sub> MALDI TOF mass spectrum.**

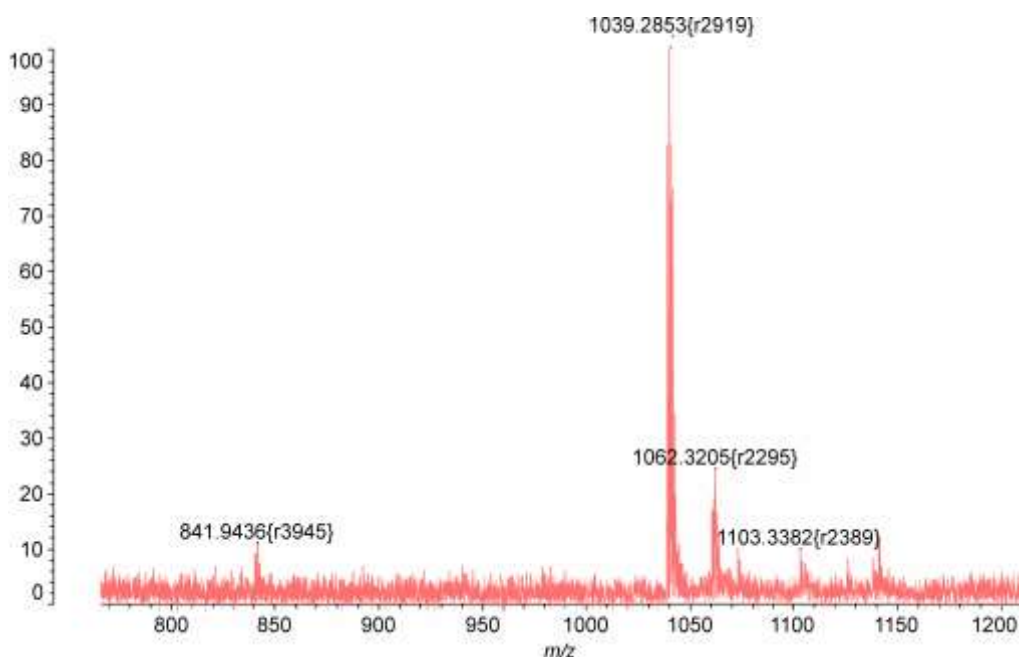

**Table S1. UV-vis spectra of several *meso*-substituted porphyrins and cobalt porphyrins.**

| Compound            | Solvent           | Soret band $\lambda$ , nm | <i>Q</i> bands $\lambda$ , nm |     |     |     | ref       |
|---------------------|-------------------|---------------------------|-------------------------------|-----|-----|-----|-----------|
| H <sub>2</sub> TPP  | toluene           | 419                       | 514                           | 548 | 592 | 648 | [1]       |
| H <sub>2</sub> TIPP | CHCl <sub>3</sub> | 419                       | 517                           | 550 | 590 | 647 | [2]       |
| H <sub>2</sub> TBPP | CHCl <sub>3</sub> | 421                       | 518                           | 554 | 590 | 649 | [3]       |
| <b>5</b>            | toluene           | 423                       | 517                           | 551 | 593 | 649 | this work |
| CoTPP               | toluene           | 413                       | 529                           | -   | -   | -   | [4]       |
| CoTIPP              | toluene           | 415                       | 531                           | 615 | -   | -   | [5]       |
| CoTBPP              | toluene           | 415                       | 530                           | 613 | -   | -   | [3]       |
| CoDTBCP             | toluene           | 419                       | 532                           | -   | -   | -   | this work |

TPP - 5,10,15,20-tetraphenylporphin

TIPP - 5,10,15,20-(tetra-4-isopropylphenyl)porphin

TBPP - 5,10,15,20-(tetra-4-*tert*-butylphenyl)porphin

[1] B. Ventura, L. Flamigni, G. Marconi, F. Lodato, D.L. Officer // *New J. Chem.* 2008, 32, 166–178.

[2] H. Dehghani, R. Sahba, M. Afrooz, H.Mollaei // *J. Chinese Chem. Soc.* 2010, 57, 690-695.

[3] N.G. Bichan, E.N. Ovchenkova, M.S. Gruzdev, T.N. Lomova // *J. Struct. Chem.* 2018, 59, 711-719.

[4] N.G. Bichan, E.N. Ovchenkova, V.A. Mozgova, N.O. Kudryakova, T.N. Lomova // *Rus. J. Inorg. Chem.* 2019, 64, 605–614.

[5] N.G. Bichan, E.N. Ovchenkova, V.A. Mozgova, N.O. Kudryakova, M. S. Gruzdev, T.N. Lomova // *Rus. J. Phys. Chem. A.* 2020, 94, 1159–1166.

**Table S2. The chemical shifts of H<sub>β</sub> and H<sub>o</sub> in cobalt(II) porphyrins and their supramolecular systems with pyrrolidino[60]/[70]fullerenes.**

| Complex                                   | H <sub>β</sub> , ppm     | H <sub>o</sub> , ppm | ref       |
|-------------------------------------------|--------------------------|----------------------|-----------|
| CoTPP                                     | 15.94 br.s.              | 13.16 br.s.          | [1]       |
| (PyC <sub>60</sub> ) <sub>2</sub> CoTPP*  | 13.50 br.s.              | 9.88 br.s.           | [1]       |
| CoTIPP                                    | 16.06 br.s.              | 13.21 br.s.          | [2]       |
| (PyC <sub>60</sub> ) <sub>2</sub> CoTIPP  | 14.31 br.s.              | 10.97 br.s.          | [2]       |
| CoTBPP                                    | 16.05 br.s.              | 13.24 br.s.          | [3]       |
| (PyC <sub>60</sub> ) <sub>2</sub> CoTBPP  | 14.62 br.s.              | 11.40 br.s.          | [3]       |
| CoDTBCP                                   | 16.29 br.s., 15.05 br.s. | 12.11 br.s.          | this work |
| (PyC <sub>60</sub> ) <sub>2</sub> CoDTBCP | 14.42 m                  | 10.09 br.s.          | this work |
| (Py <sub>2</sub> C <sub>70</sub> )CoDTBCP | 16.01 br.s., 14.89 br.s. | 12.08 br.s.          | this work |

[1] N.G. Bichan, E.N. Ovchenkova, V.A. Mozgova, N.O. Kudryakova, T.N. Lomova // *Rus. J. Inorg. Chem.* 2019, 64, 605–614.

[2] N.G. Bichan, E.N. Ovchenkova, V.A. Mozgova, N.O. Kudryakova, M. S. Gruzdev, T.N. Lomova // *Rus. J. Phys. Chem. A.* 2020, 94, 1159–1166.

[3] N.G. Bichan, E.N. Ovchenkova, M.S. Gruzdev, T.N. Lomova // *J. Struct. Chem.* 2018, 59, 711-719.

**Figure S3.** The transformation of the UV-vis spectrum of the CoDTBCP –  $5.49 \times 10^{-5}$  M PyC<sub>60</sub> mixture in toluene at 298 K during 1000 seconds.

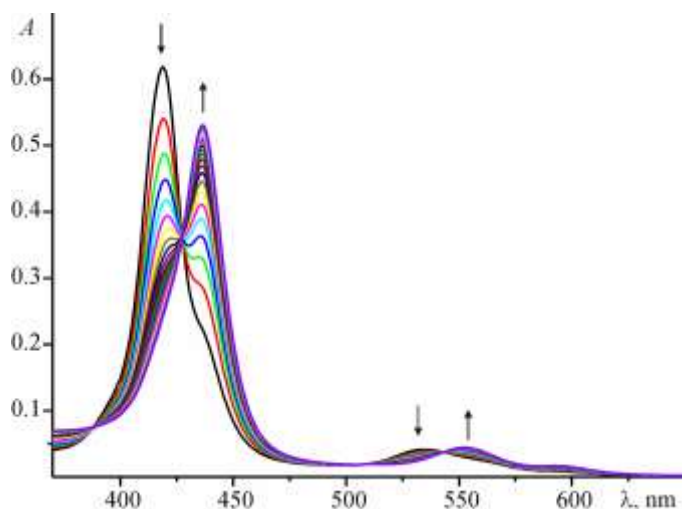

**Figure S4.** The plots of  $\log((A_0 - A_\infty)/(A_\tau - A_\infty))$  vs  $\tau$  for the reaction of CoDTBCP with PyC<sub>60</sub> in toluene at 298 K.

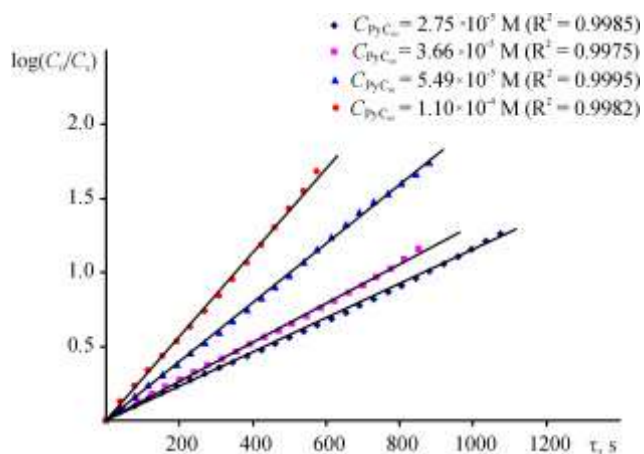

**Figure S5.** The plot of  $\log k_{\text{obs}}$  vs  $\log C_{\text{PyC}_60}$  for the reaction of CoDTBCP with PyC<sub>60</sub> in toluene at 298 K.

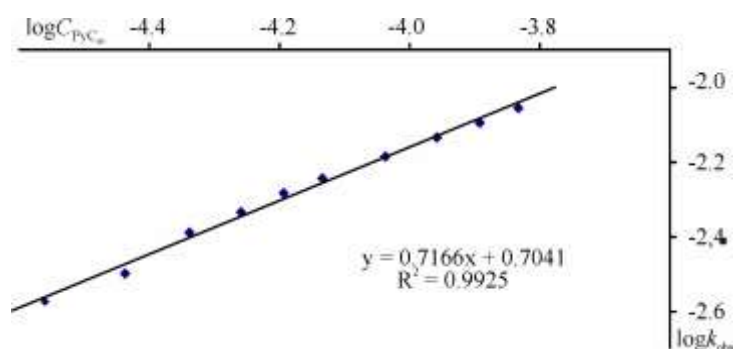

**Figure S6.** The plots of  $\log((A_0 - A_\infty)/(A_\tau - A_\infty))$  vs  $\tau$  for the reaction of CoDTBCP with Py<sub>2</sub>C<sub>70</sub> in toluene at 298 K.

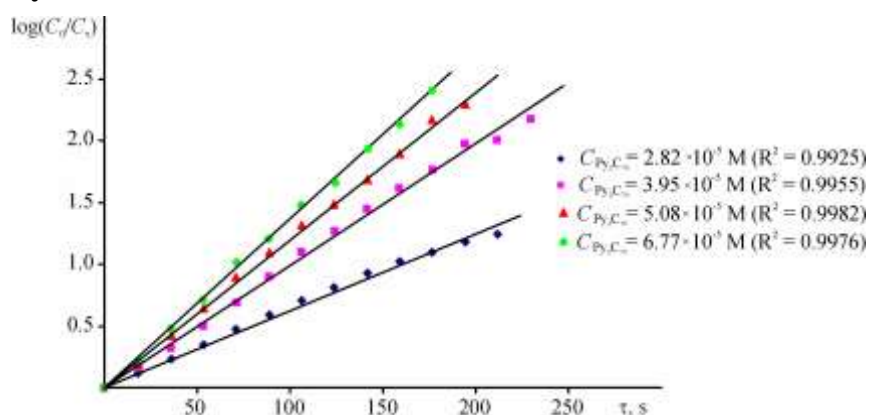

**Figure S7.** The plot of  $\log k_{\text{obs}}$  vs  $\log C_{\text{Py}_2\text{C}_{70}}$  for the reaction of CoDTBCP with Py<sub>2</sub>C<sub>70</sub> in toluene at 298 K.

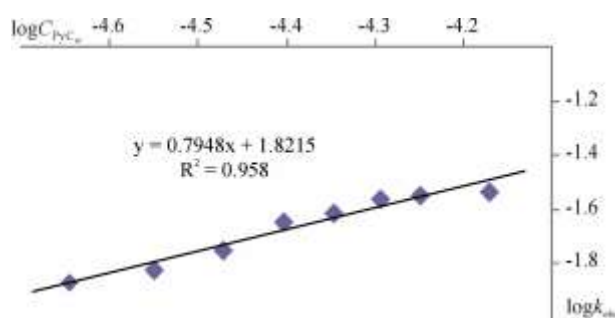

**Figure S8.** The IR spectra of CoDTBCP (black) and its triad with Py<sub>2</sub>C<sub>70</sub> (green) in KBr. Bands corresponding to vibrations of Py<sub>2</sub>C<sub>70</sub> are denoted with asterisks.

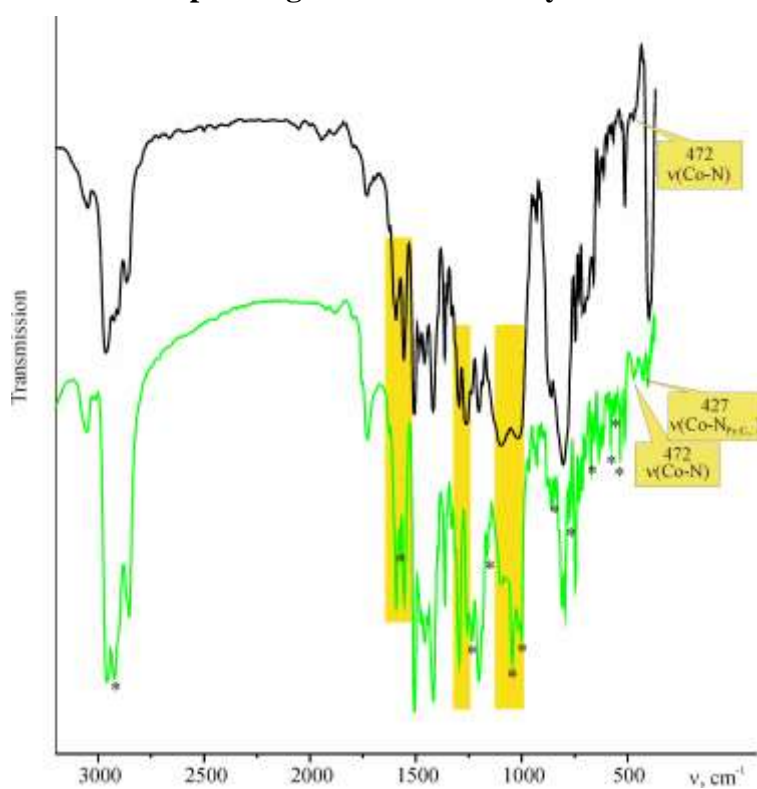

Figure S9. The  $^1\text{H}$  NMR spectrum of CoDTBCP (*a*), its triad,  $(\text{PyC}_{60})_2\text{CoDTBCP}$  (*b*), and its dyad,  $(\text{Py}_2\text{C}_{70})\text{CoDTBCP}$  (*c*) in  $\text{CDCl}_3$ .

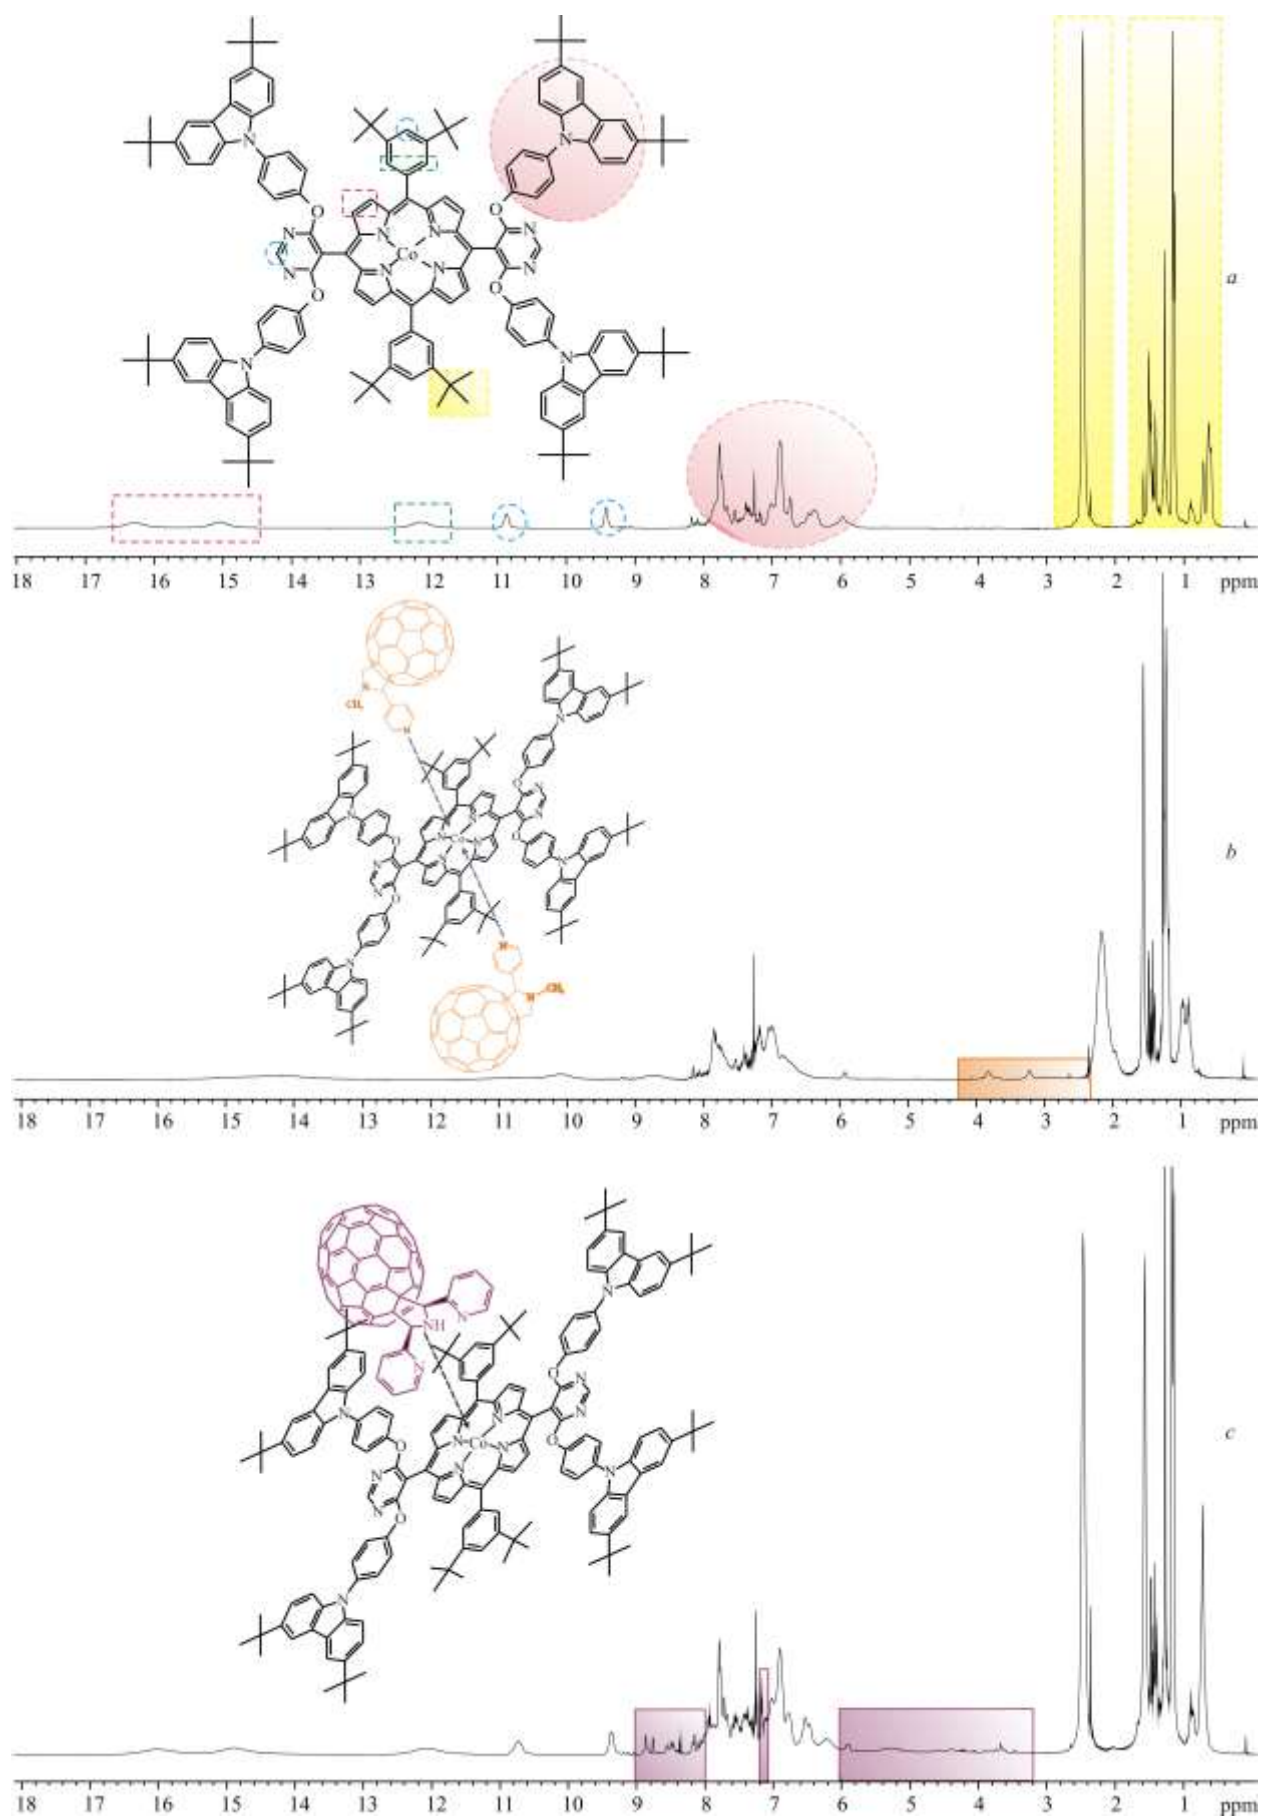

Figure S10. The optimized structures of  $(\text{PyC}_{60})_2\text{CoDTBCP}$  (a) and  $(\text{Py}_2\text{C}_{70})\text{CoDTBCP}$  (b).

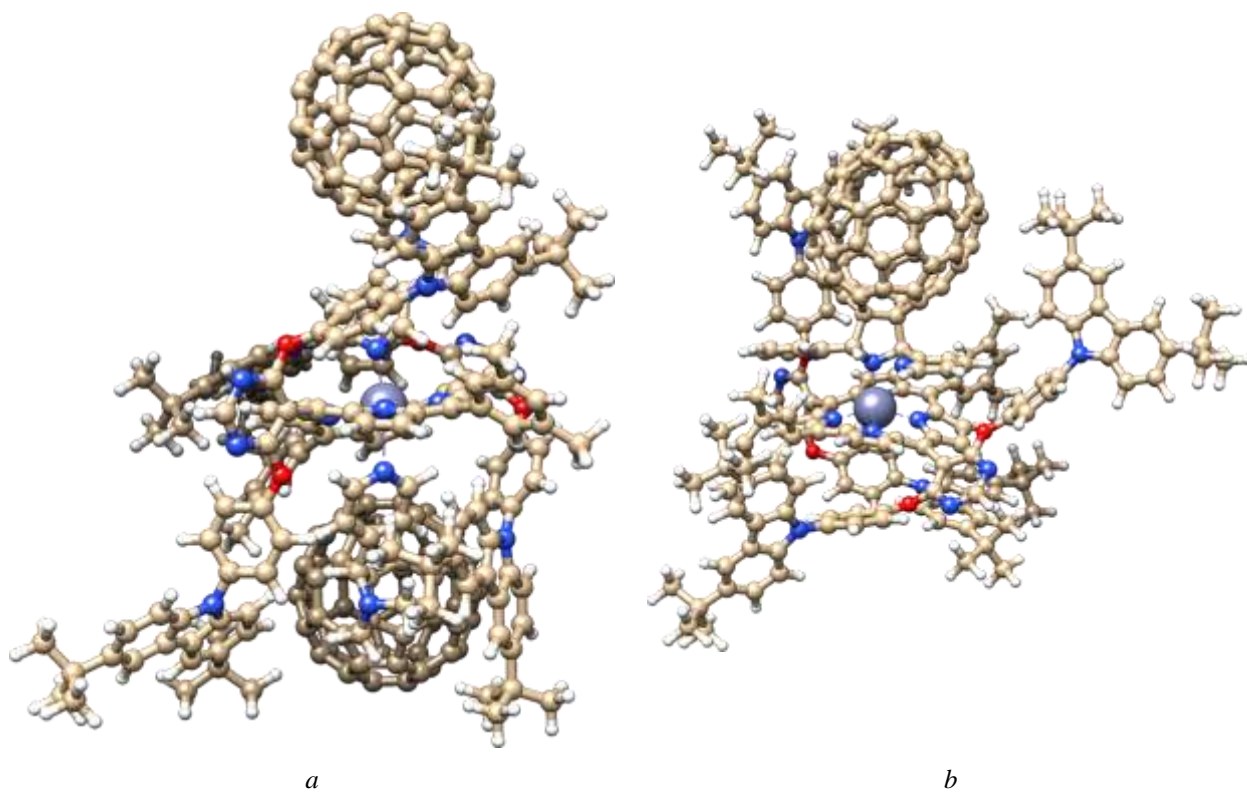

Table S3. The structural parameters (bond lengths, angles, and bonding energy ( $E_b$ )) of  $(\text{PyC}_{60})_2\text{CoDTBCP}$  and  $(\text{Py}_2\text{C}_{70})\text{CoDTBCP}$ .

| <br>$(\text{PyC}_{60})_2\text{CoDTBCP}$ |                |              |          |                                          |
|-----------------------------------------|----------------|--------------|----------|------------------------------------------|
|                                         | Bond length, Å |              | Angle, ° | $E_b$ , $\text{kJ}\cdot\text{mol}^{-1a}$ |
| Co–N(1)                                 | 2.056          | N(1)–Co–N(2) | 88.36    | 220                                      |
| Co–N(2)                                 | 2.037          | N(2)–Co–N(3) | 92.18    |                                          |
| Co–N(3)                                 | 2.016          | N(3)–Co–N(4) | 89.52    |                                          |
| Co–N(4)                                 | 2.044          | N(4)–Co–N(1) | 89.09    |                                          |
| Co–N(5)                                 | 2.158          | N(1)–Co–N(3) | 169.55   |                                          |



|                                              |                       |              |                 |                                                   |
|----------------------------------------------|-----------------------|--------------|-----------------|---------------------------------------------------|
| Co–N(6)                                      | 2.409                 | N(2)–Co–N(4) | 174.72          |                                                   |
|                                              |                       | N(1)–Co–N(5) | 86.11           |                                                   |
|                                              |                       | N(2)–Co–N(5) | 81.37           |                                                   |
|                                              |                       | N(3)–Co–N(5) | 83.65           |                                                   |
|                                              |                       | N(4)–Co–N(5) | 93.84           |                                                   |
|                                              |                       | N(1)–Co–N(5) | 91.51           |                                                   |
|                                              |                       | N(2)–Co–N(5) | 91.71           |                                                   |
|                                              |                       | N(3)–Co–N(5) | 98.90           |                                                   |
|                                              |                       | N(4)–Co–N(5) | 92.99           |                                                   |
| <p>(Py<sub>2</sub>C<sub>70</sub>)CoDTBCP</p> |                       |              |                 |                                                   |
|                                              | <b>Bond length, Å</b> |              | <b>Angle, °</b> | <b><i>E<sub>b</sub></i>, kJ·mol<sup>-1a</sup></b> |
| Co–N(1)                                      | 2.055                 | N(1)–Co–N(2) | 86.13           | 117                                               |
| Co–N(2)                                      | 2.055                 | N(2)–Co–N(3) | 87.39           |                                                   |
| Co–N(3)                                      | 2.024                 | N(3)–Co–N(4) | 88.32           |                                                   |
| Co–N(4)                                      | 2.037                 | N(4)–Co–N(1) | 87.50           |                                                   |
| Co–N(5)                                      | 2.315                 | N(1)–Co–N(3) | 161.34          |                                                   |
|                                              |                       | N(2)–Co–N(4) | 146.56          |                                                   |
|                                              |                       | N(1)–Co–N(5) | 90.36           |                                                   |
|                                              |                       | N(2)–Co–N(5) | 107.99          |                                                   |
|                                              |                       | N(3)–Co–N(5) | 108.29          |                                                   |
|                                              |                       | N(4)–Co–N(5) | 104.84          |                                                   |

<sup>a</sup>The bonding energy ( $E_b$ ) was calculated as follows:  $E_b = |E_{\text{triad/dyad}} - (E_{\text{CoDTBCP}} + E_{\text{PyC}_{60}/\text{Py}_2\text{C}_{70}})|$ .

**Figure S11. Femtosecond transient absorption spectrum of CoDTBCP in toluene at the excitation wavelength of 400 nm (Insert: the time profile of transient peaks of CoDTBCP).**

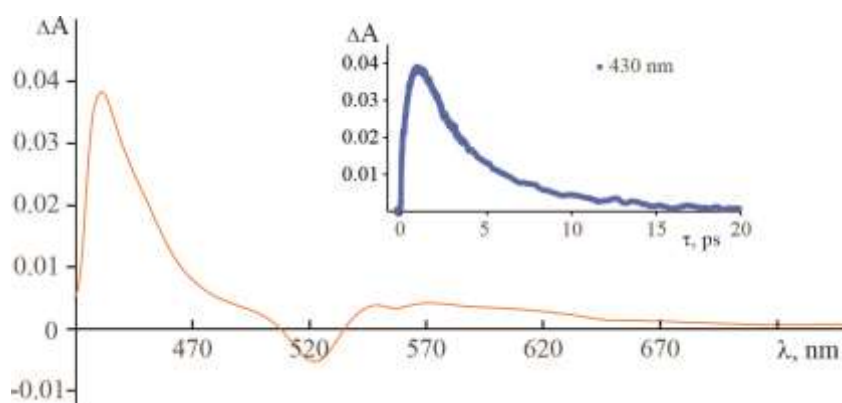

Supplement: d1nj00980j1.pdf [file d1nj00980j1.pdf]
